# Supplementary material
Source: Springer Nature journal article supplement (https://www.springermedizin.de/resource/supplementary/13033_2009_52_MOESM2_ESM.pdf/9651738)

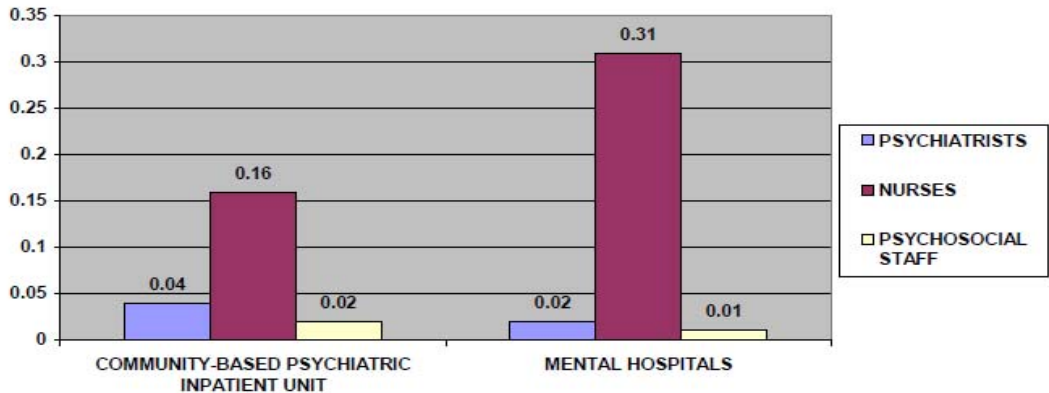

Supplement: MOESM2 [file 9651738]
